# Supplementary material for: chromploid: An R package for chromosome number evolution across the plant tree of life
Source: PubMed Central journal article supplement (PMC5895187; doi:10.1002/aps3.1037), 2018-04-11
Supplement: APS3-6-e1037-s002.pdf [file APS3-6-e1037-s002.pdf]

Appendix S2. Graphical representation of the model proposed to analyze the *Solanum* data set. The *Solanum* model is a continuous time Markov Chain (Mkn model) containing 10 states, five herbaceous and five woody, each with chromosome number values 12, 18, 24, 36, and 48. It is defined via six parameters: two for chromosome doubling as a proxy of polyploidy ( $\rho_H, \rho_W$ ), two for increase by six or 12 chromosomes as a proxy of demiploidy ( $\epsilon_H, \epsilon_W$ ), and two representing the transitions between woody and herbaceous states ( $q_{HW}, q_{WH}$ ).

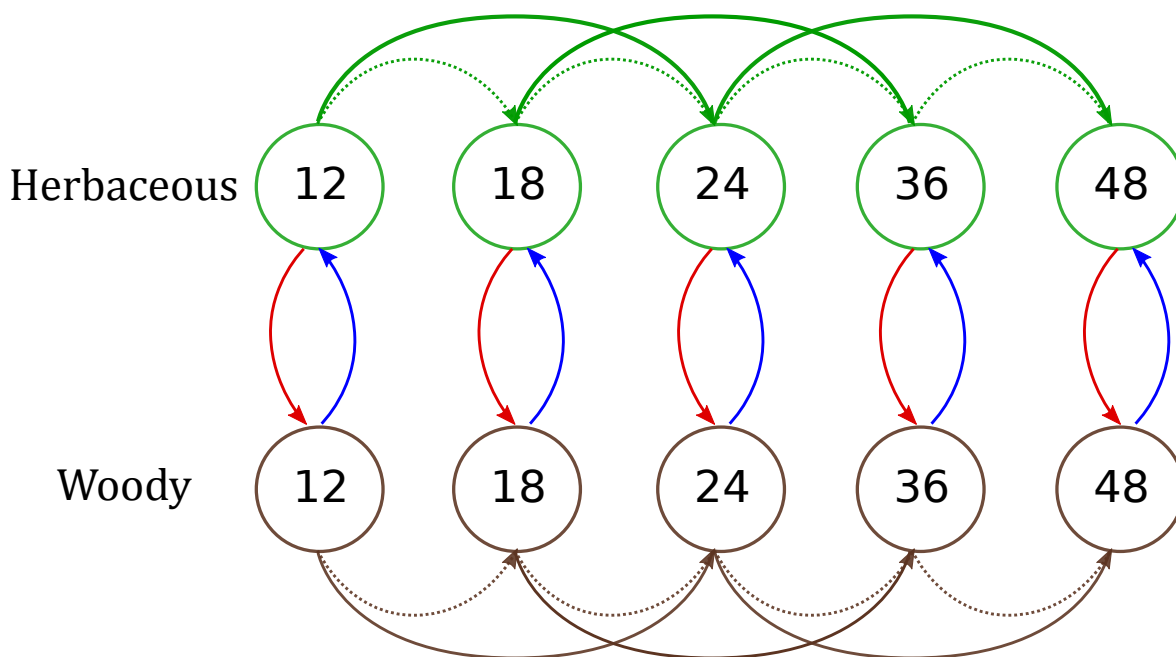

|                                                  |                                                            |
|--------------------------------------------------|------------------------------------------------------------|
| $\rho_H=0.139$<br>Rate polyploidy herbaceous     | $\rho_W=0.002$<br>Rate polyploidy woody                    |
| $\epsilon_H=0.084$<br>Rate demiploidy herbaceous | $\epsilon_W=1.14 \times 10^{-19}$<br>Rate demiploidy woody |
| $q_{HW}=0.835$<br>Rate herbaceous to woody       | $q_{WH}=0.453$<br>Rate woody to herbaceous                 |
