# Supplementary material for: chromploid: An R package for chromosome number evolution across the plant tree of life
Source: PubMed Central journal article supplement (PMC5895187; doi:10.1002/aps3.1037), 2018-04-11

Appendix S3. Results of simulations for trees with 75 taxa under scenarios 1 and 2. Although type I error is 23%, the power of detection for a large difference in polyploidy rates remains small, showing the need of increasing sample size.

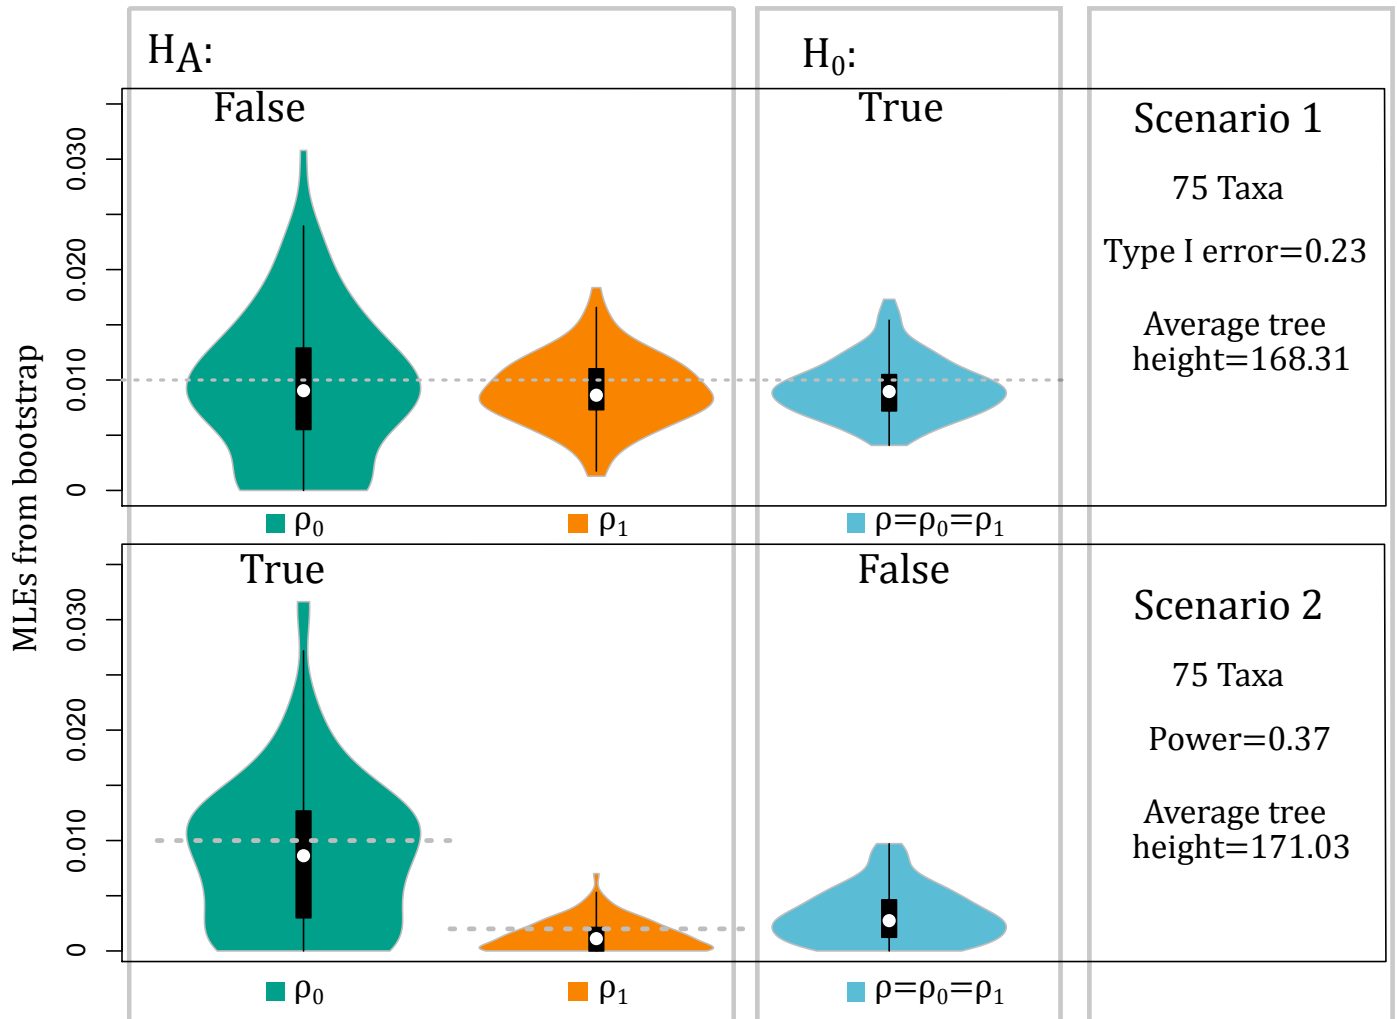

Supplement: APS3-6-e1037-s003.pdf [file APS3-6-e1037-s003.pdf]
